# Supplementary material
Source: PubMed Central journal article supplement (PMC3082259)
Supplement: supp_tpc.111.083485_Supplemental_Data.pdf [file supp_tpc.111.083485_Supplemental_Data.pdf]

## Supplemental Figures

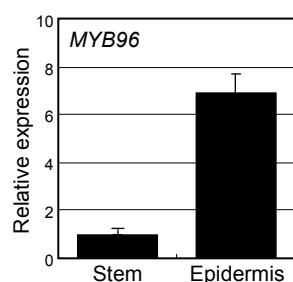

### Supplemental Figure 1. Expression of *MYB96* in epidermal cells of stems

*Arabidopsis* plants were grown in soil for 5 weeks before harvesting plant materials. Total RNAs were extracted from the inflorescence stems and stem epidermal peels as described previously (Suh et al., 2005). The *Actin7* (At5g09810) gene was used as internal control. Transcript levels were examined by qRT-PCR. Biological triplicates were averaged. Bars indicate standard error of the mean.

Suh, M.C., Samuels, A.L., Jetter, R., Kunst, L., Pollard, M., Ohlrogge, J., and Beisson, F. (2005). Cuticular lipid composition, surface structure, and gene expression in *Arabidopsis* stem epidermis. *Plant Physiol.* **139**: 1649-1665.

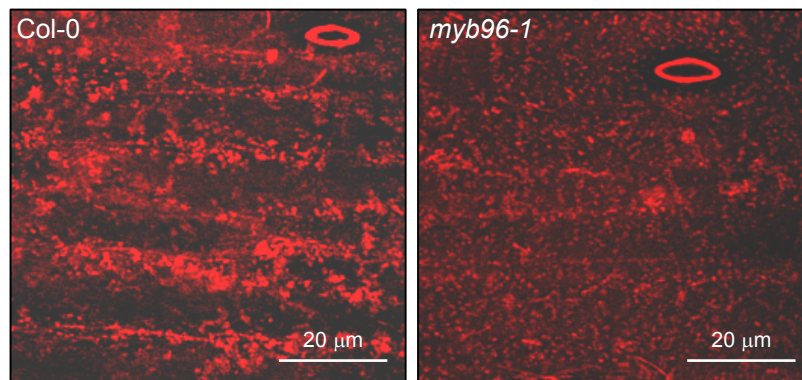

**Supplemental Figure 2. Epicuticular wax deposition in *myb96-1* stems**

Four-week-old plants grown in soil were used. Epicuticular wax crystals on the inflorescence stem segments from tip to 2 cm were visualized by Nile red staining as described previously (Pighin et al., 2004).

Pighin, J.A., Zheng, H., Balakshin, L.J., Goodman, I.P., Western, T.L., Jetter, R., Kunst, L., and Samuels, A.L. (2004). Plant cuticular lipid export requires an ABC transporter. *Science* **306**: 702-704.

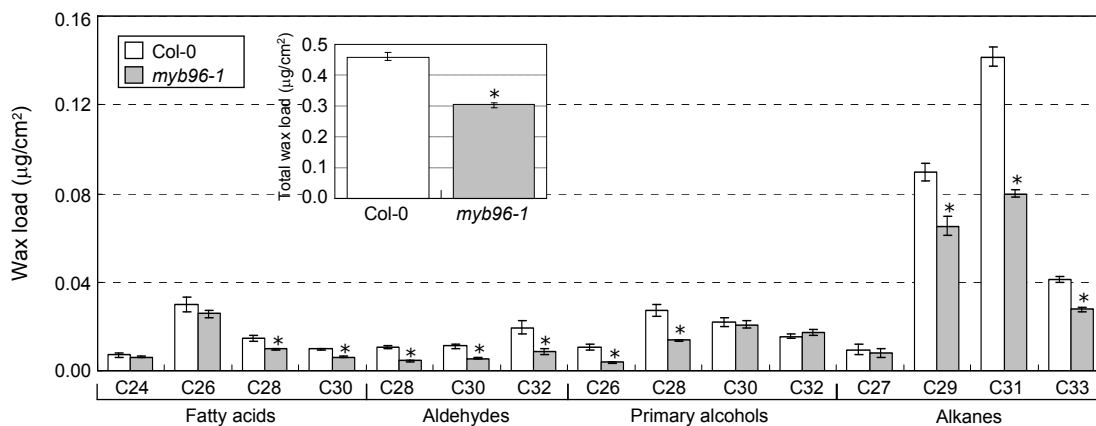

**Supplemental Figure 3. Cuticular wax composition in *myb96-1* leaves**

Rosette leaves of 4-week-old plants grown in soil were used for analysis of cuticular wax composition and loads. Biological triplicates were averaged and statistically treated using a student *t*-test (\**P*<0.01). Bars indicate standard error of the mean. The wax loads were expressed in μg/cm<sup>2</sup>.

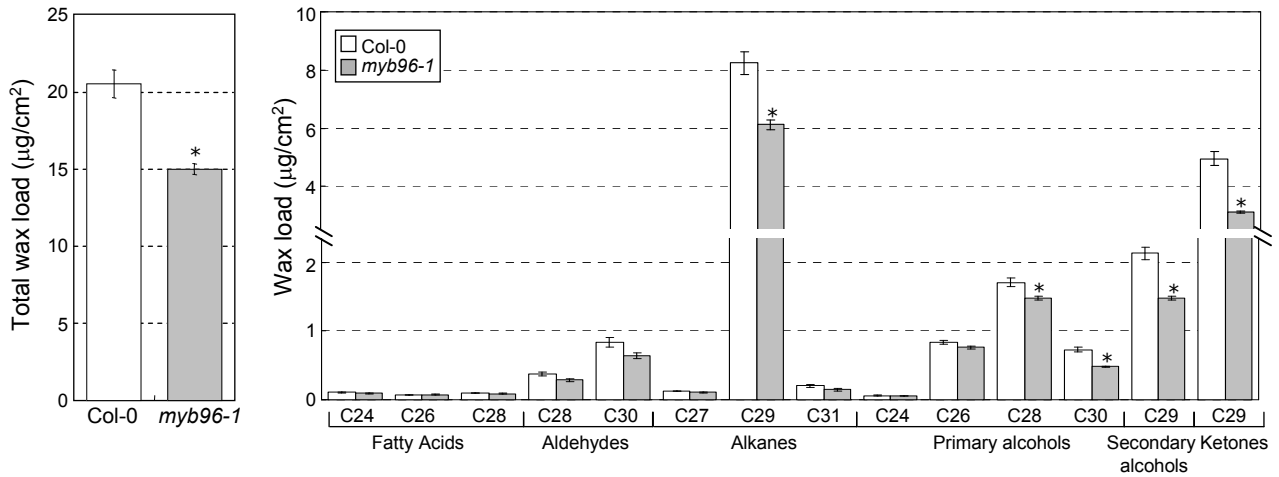

**Supplemental Figure 4. Cuticular wax composition in *myb96-1* stems**

Inflorescence stems of 5-week-old plants grown in soil were used for analysis of cuticular wax composition and loads. Biological triplicates were averaged and statistically treated using a student *t*-test (\**P*<0.01). Bars indicate standard error of the mean. Wax loads were expressed in µg/cm<sup>2</sup>.

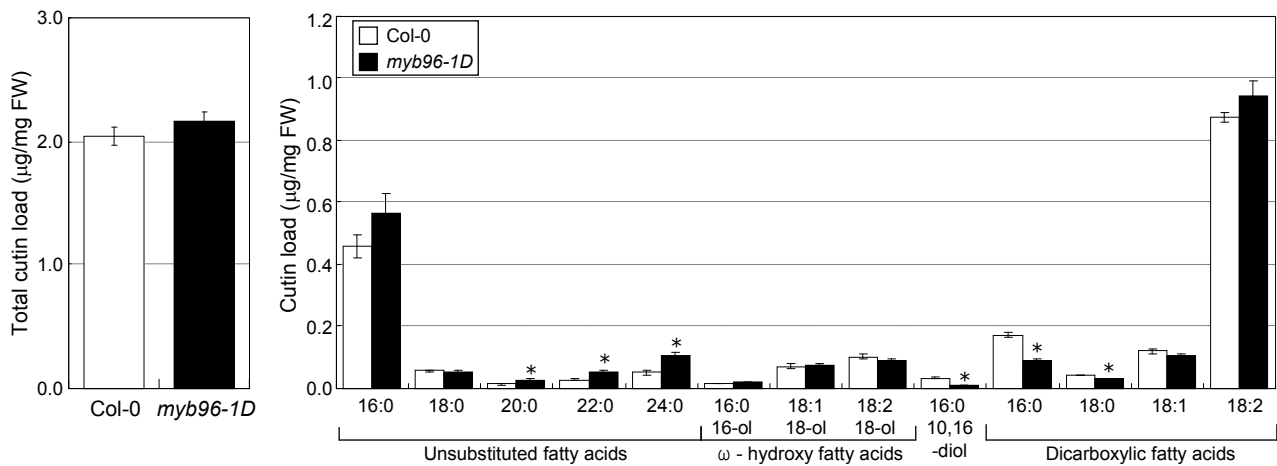

### Supplemental Figure 5. Cutin biosynthesis in *myb96-1D* leaves

Rosette leaves of 4-week-old plants grown in soil were used for measurements of composition and contents of cutin polyester monomers as described previously (Li-Beisson et al., 2010). Biological triplicates were averaged and statistically treated using a student *t*-test (\**P*<0.01). Bars indicate standard error of the mean.

Li-Beisson, Y., Shorrosh, B., Beisson, F., X. Andersson, M., Arondel, V., Bates, P., Baud, S., Bird, D., DeBono, A., Durrett, T., Franke, R., Graham, I., Katayama, K., Kelly, A., Larson, T., Markham, J. Miquel, M., Molina, I., Nishida, I., Rowland, O. Samuels, L., Schmid, K., Wada, H., Welti, R., Xu, C., Zallot, R., and Ohlrogge, J. (2010). Acyl-Lipid Metabolism. In the Arabidopsis Book, Rockville, MD: American Society of Plant Biologist.

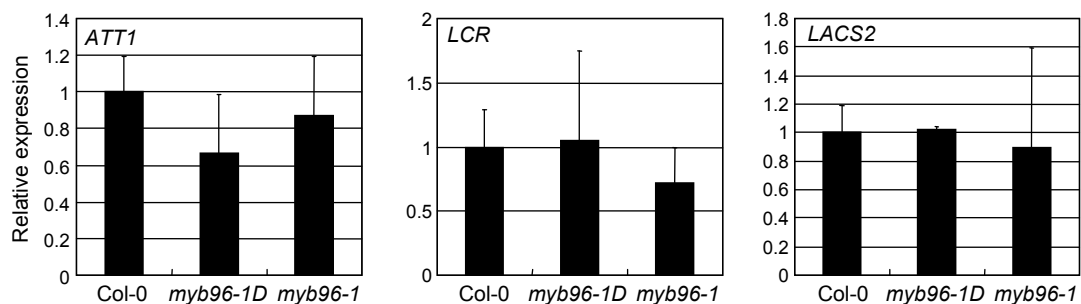

### Supplemental Figure 6. Expression of cutin biosynthetic genes in *myb96-1D* and *myb96-1*

Two-week-old whole plants grown on MS-agar plates were used for extraction of total RNAs. Transcript levels were examined by qRT-PCR. Biological triplicates were averaged. Bars indicate standard error of the mean.

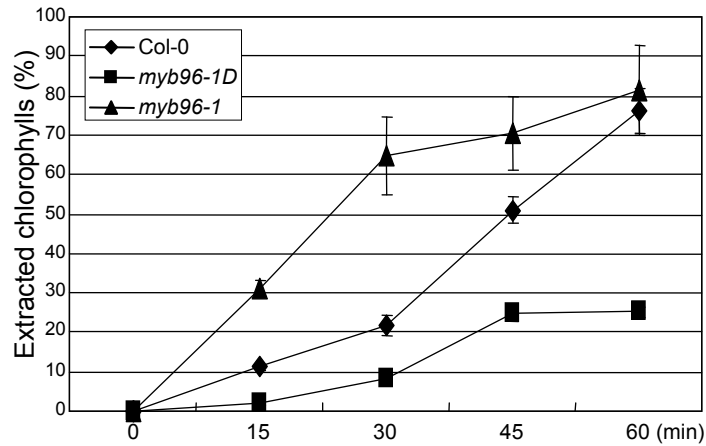

**Supplemental Figure 7. Rate of chlorophyll leaching in *myb96-1D* and *myb96-1* leaves**

Rosette leaves of 2-week-old plants grown on MS-agar plates were incubated on ice for 30 min and subsequently soaked in 80 % ethanol for the indicated time periods. The extracted chlorophyll contents at individual time points were expressed as percentages of extracted chlorophyll contents at 24 h after initial immersion. Three measurements were averaged at each time points. Bars indicate standard error of the mean.

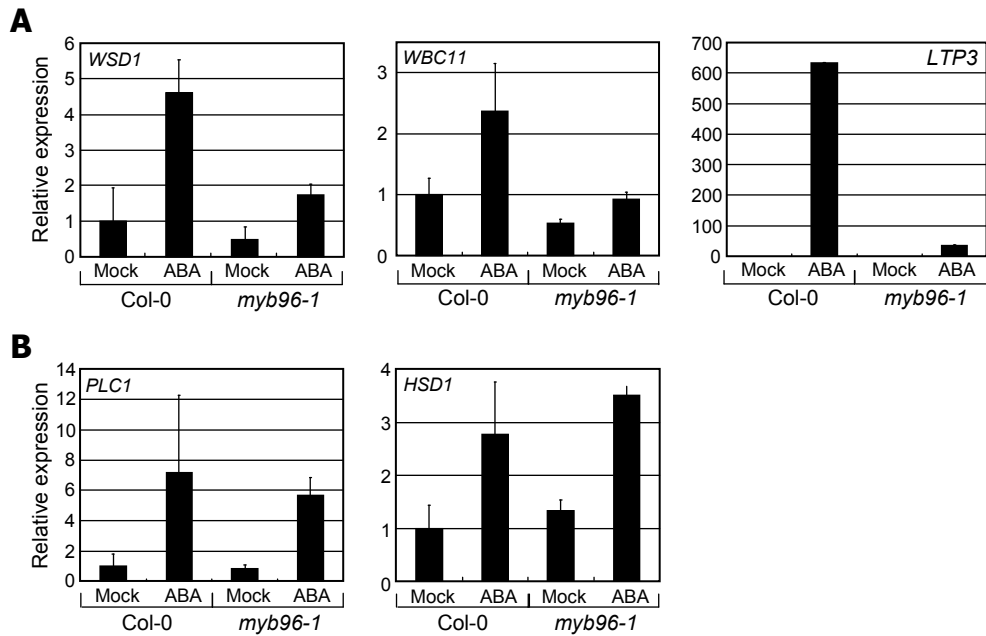

**Supplemental Figure 8. MYB96 regulation of wax biosynthetic genes in response to ABA**

Two-week-old plants grown on MS-agar plates were transferred to MS liquid cultures supplemented with 20  $\mu$ M ABA (6 h) before harvesting whole plants for extraction of total RNAs. Transcript levels were examined by qRT-PCR. Biological triplicates were averaged. Bars indicate standard error of the mean. Note that ABA regulation of wax biosynthetic genes depends on MYB96 (A). Genes encoding lipid metabolic enzymes are also induced by ABA. However, the inductive effects of ABA are largely independent of MYB96 (B).

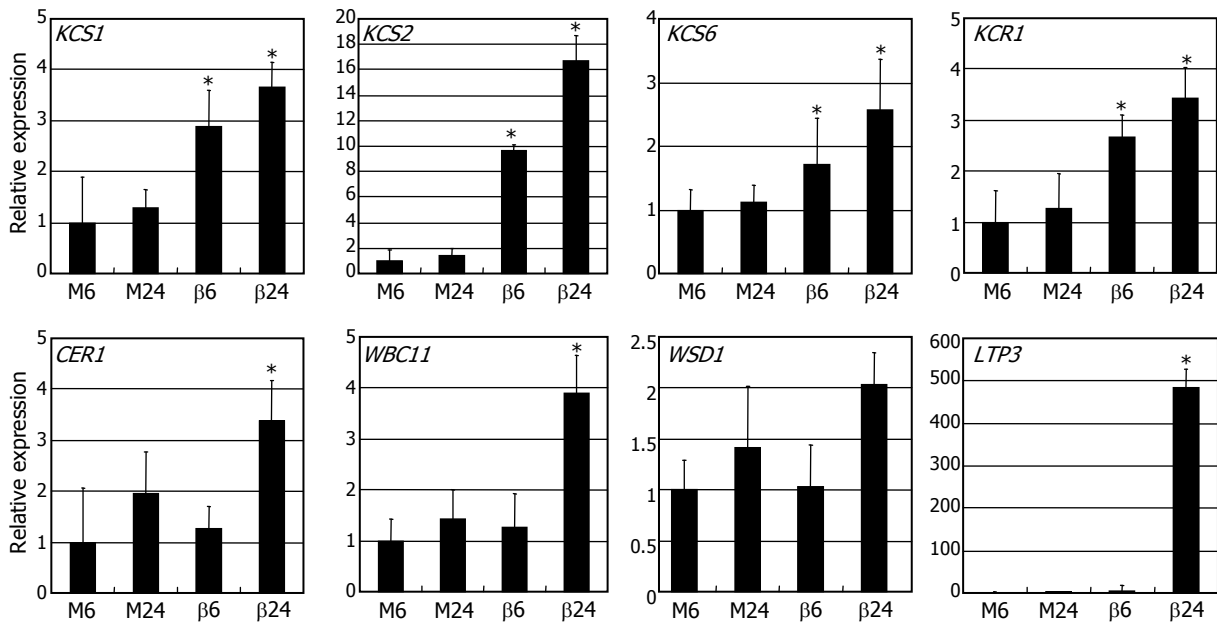

**Supplemental Figure 9. Effects of *MYB96* induction on wax biosynthetic gene expression**

Two-week-old transgenic plants expressing the *pER8-MYB96* gene fusion under the control of a  $\beta$ -estradiol-inducible promoter were incubated in MS liquid cultures supplemented with 10  $\mu$ M  $\beta$ -estradiol ( $\beta$ ). Whole plants were harvested at the indicated time points (h) after  $\beta$ -estradiol application for total RNA extraction. Transcript levels were examined by qRT-PCR. Biological triplicates were averaged. Statistical significance of the measurements was determined using a student *t*-test by comparing with M6 measurements (*t*-test, \**P*<0.01). Bars indicate standard error of the mean. M, mock.

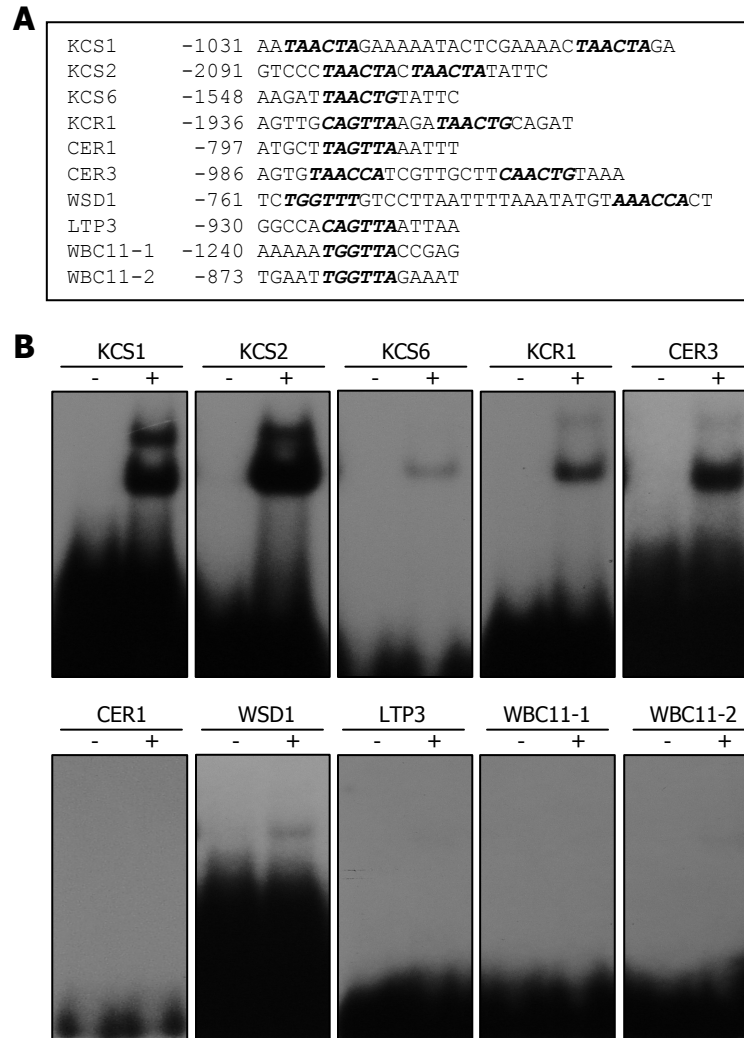

**Supplemental Figure 10. Binding of MYB96 to the consensus sequences in the promoters of wax biosynthetic genes *in vitro***

(A) Putative MYB-binding consensus sequences in the gene promoters. Core binding sequences are marked by bold, italic characters.

(B) *in vitro* binding of MYB96 to the consensus sequences. The (-) lanes are controls without adding a recombinant maltose-binding protein (MBP)-MYB96 protein.



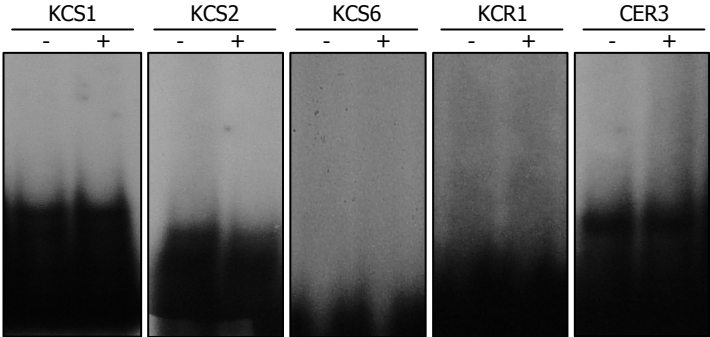

**Supplemental Figure 11. *in vitro* binding of MBP alone to the consensus sequences**  
The (-) lanes are controls without adding MBP proteins.

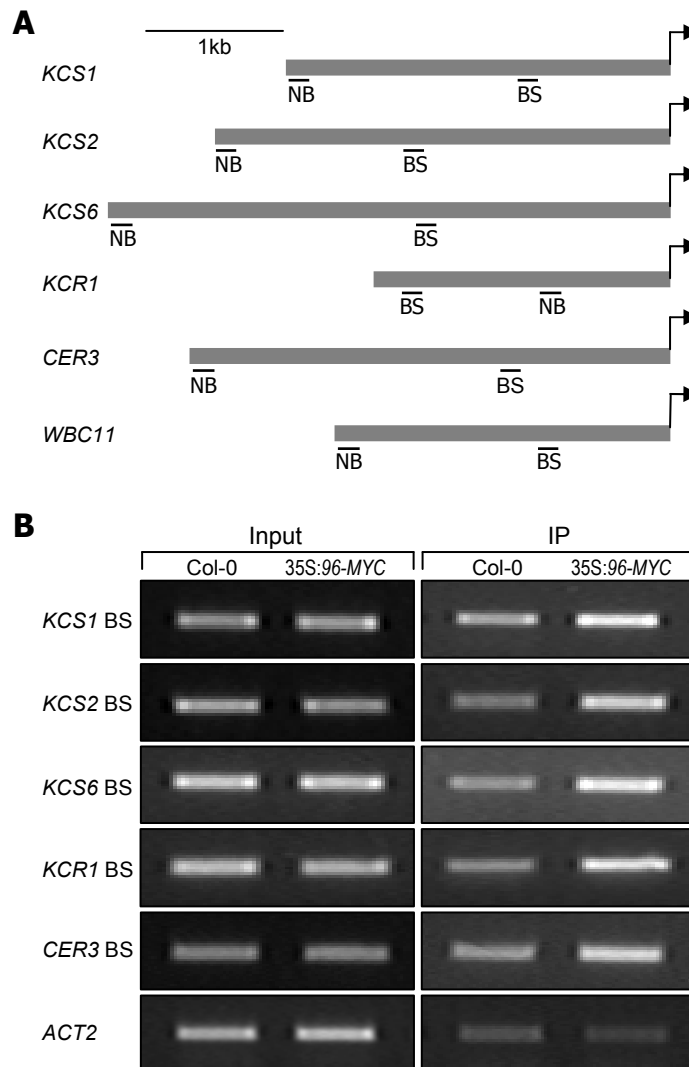

**Supplemental Figure 12. Direct binding of MYB96 to the promoters of wax biosynthetic genes *in vivo***

(A) Representation of the wax biosynthetic gene promoters. Black lines indicate the sequence regions used for ChIP assays. NB, non-binding sequence; BS, binding sequence.

(B) ChIP assays with an anti-MYC antibody. The 35S:96-MYC transgenic plants grown on MS-agar plates for 3 weeks were used. The *ACT2* gene was used as negative control.

**Supplemental Table 1. Primers used in qRT-PCR and subcloning**

| <b>Primer</b>   | <b>Usage</b> | <b>Sequence</b>                            |
|-----------------|--------------|--------------------------------------------|
| MYB96-F         | qRT-PCR      | 5' -TGCAGTCTCGGAAGAAGGTG                   |
| MYB96-R         | qRT-PCR      | 5' -CATCTCGTGGCTTTGCTCAT                   |
| KCS1-F          | qRT-PCR      | 5' -TCTCCTGCTACAAACCGGAA                   |
| KCS1-R          | qRT-PCR      | 5' -CCGTGTCATCGGTGAATGAT                   |
| KCS2-F          | qRT-PCR      | 5' -CAACCTCGCTTTCCAACAAA                   |
| KCS2-R          | qRT-PCR      | 5' -TCCGGTTTTCTCAAGCACTG                   |
| KCS6-F          | qRT-PCR      | 5' -TATTGTCGCCGTTGAGCTTC                   |
| KCS6-R          | qRT-PCR      | 5' -TTCCATGAAAGTTGCGAAGG                   |
| KCR1-F          | qRT-PCR      | 5' -CAAATCACAAACCCACTTGGC                  |
| KCR1-R          | qRT-PCR      | 5' -AGGTTTTTGGATGGTCGGAG                   |
| CER1-F          | qRT-PCR      | 5' -AGGTCGACAGGGAGACCAAC                   |
| CER1-R          | qRT-PCR      | 5' -ATAAGCGCTGCCATCAACAC                   |
| CER3/WAX2-F     | qRT-PCR      | 5' -GGAAACGCAACGTTATTGGA                   |
| CER3/WAX2-R     | qRT-PCR      | 5' -AGCGTAACCGTAGATCGCAC                   |
| LTP3-F          | qRT-PCR      | 5' -TGGCTCCATGTGCAACCTAT                   |
| LTP3-R          | qRT-PCR      | 5' -GGACTGGATGCATCTGCAAG                   |
| PLC1-F          | qRT-PCR      | 5' -GACATGTTTTCCGTTGTCCG                   |
| PLC1-R          | qRT-PCR      | 5' -AAGACAAACCGCATGAGCAG                   |
| WBC11-F         | qRT-PCR      | 5' -CCTGCGTTAAGGAACCCCTTC                  |
| WBC11-R         | qRT-PCR      | 5' -GGATCATCGCTTGCTTCAAA                   |
| HSD1-F          | qRT-PCR      | 5' -GTGCTTCCTCCGGTATAGGC                   |
| HSD1-R          | qRT-PCR      | 5' -GGAGACATCAGCATGAACGG                   |
| WSD1-F          | qRT-PCR      | 5' -GCTTGGTGGTTGTTTGTGTTG                  |
| WSD1-R          | qRT-PCR      | 5' -TCGGGTTACCCATAAGAGGG                   |
| ATT1-F          | qRT-PCR      | 5' -AATTCAAACCGGAGAGGTGG                   |
| ATT1-R          | qRT-PCR      | 5' -AGATCCTAGGTCCGGCGTTA                   |
| LCR-F           | qRT-PCR      | 5' -TAAAGGTCCAACGTGGCAAG                   |
| LCR-R           | qRT-PCR      | 5' -CTTACGCTGAAAAAGCCACG                   |
| LACS2-F         | qRT-PCR      | 5' -GTTGATCCGGGACACTGTTG                   |
| LACS2-R         | qRT-PCR      | 5' -ACGTAGGTGATCCCTTGGCT                   |
| eIF4a-F         | qRT-PCR      | 5' -TGACCACACAGTCTCTGCAA                   |
| eIF4a-R         | qRT-PCR      | 5' -ACCAGGGAGACTTGTGGAC                    |
| ACT2-F          | qRT-PCR      | 5' -CCATCCTCCGTCTTGACCTT                   |
| ACT2-R          | qRT-PCR      | 5' -ACTTGCCCATCGGGTAATTC                   |
| MYB96-F         | Subcloning   | 5' -AAAAAGCAGGCTCGATGGGAAGACCACCTTGC       |
| MYB96-R         | Subcloning   | 5' -AGAAAGCTGGGTTCTAGAACATCCCTTCTTGTCTT    |
| MYB96 (pER8) -F | Subcloning   | 5' -GGCTCGAGATGGGAAGACCACCTTGC             |
| MYB96 (pER8) -R | Subcloning   | 5' -CCTTAATTAAGTCTAGAACATCCCTTCTTGTCTT     |
| MYB96 (MBP) -F  | Subcloning   | 5' -AAAAAGCAGGCTCGATGGGAAGACCACCTTGC       |
| MYB96 (MBP) -R  | Subcloning   | 5' -AGAAAGCTGGGTTTTCATTCCCATTTGACCTTGTAGTG |
| MYB96 (MYC) -F  | Subcloning   | 5' -AACTCGAGATGGGAAGACCACCTTGC             |
| MYB96 (MYC) -R  | Subcloning   | 5' -CCGGCGCGCCGAACATCCCTTCTTGTCTT          |

qRT-PCR primers were designed using the Primer Express Software installed into the Applied Biosystems 7500 Real-Time PCR System. The sizes of PCR products ranged from 80 to 150 nucleotides in length. F, forward primer; R, reverse primer.

### Supplemental Table 2. Primers used in ChIP assays

| <u>Primer</u> | <u>Sequence</u>            |
|---------------|----------------------------|
| KCS1 (BS) -F  | 5' -ATTTTGGACACCTTGGCACA   |
| KCS1 (BS) -R  | 5' -TGGGCCATGGTAAATTGATG   |
| KCS1 (NB) -F  | 5' -GCCGTTGAAGAACAAAAGCA   |
| KCS1 (NB) -R  | 5' -CCAACCCGAGTTTGGAGGAT   |
| KCS2 (BS) -F  | 5' -ATGCTCGCTTTGATTGATGC   |
| KCS2 (BS) -R  | 5' -ACACAAATCCGAATAGCCGA   |
| KCS2 (NB) -F  | 5' -CCACTCTCGAGCCATCAAAG   |
| KCS2 (NB) -R  | 5' -CCAGTCTCCAGATGCATGG    |
| KCS6 (BS) -F  | 5' -TGATTTTCCCTCATGCTTGC   |
| KCS6 (BS) -R  | 5' -TGGGCCCAATTGTGCATT     |
| KCS6 (NB) -F  | 5' -GTCGTAACAACCCGCAAAAA   |
| KCS6 (NB) -R  | 5' -TCGAGATGTGCAAGCATCAA   |
| KCR1 (BS) -F  | 5' -CCAAATGTGCAGGTTGCTCT   |
| KCR1 (BS) -R  | 5' -ACCATGCAAGTGATCTCCCA   |
| KCR1 (NB) -F  | 5' -TGGACATAACAGCCAAGGA    |
| KCR1 (NB) -R  | 5' -TGCCTTTGAGCTGCTTGAAC   |
| CER3 (BS) -F  | 5' -TGAAGAAGCAAGCCACCAAG   |
| CER3 (BS) -R  | 5' -ACCCAATTGATGCAATGGAC   |
| CER3 (NB) -F  | 5' -AACCATTGTTAGATCAAATGCG |
| CER3 (NB) -R  | 5' -TCTCTTTGTCACACCGTGAT   |

BS, DNA fragments containing MYB96-binding sequences; NB, non-binding DNA fragments. F, forward primer; R, reverse primer.
